# Supplementary material for: Oily bilge water treatment using DC/AC powered electrocoagulation
Source: Royal Society of Chemistry journal article supplement (doi:10.1039/c9ew00497a), 2019-01-01
Supplement: c9ew00497a1.pdf [file c9ew00497a1.pdf]

**Supporting materials for**

**Oily Bilge Water Treatment Using DC/AC Powered Electrocoagulation**

Yanhong Bian<sup>a,b</sup>, Zheng Ge<sup>a</sup>, Carl Albano<sup>a</sup>, Fernanda Leite Lobo<sup>a</sup>, Zhiyong Jason Ren<sup>\*a,b</sup>

<sup>a</sup>Department of Civil, Environmental, and Architectural Engineering, University of Colorado  
Boulder, Boulder, CO 80309

<sup>b</sup>Department of Civil and Environmental Engineering and the Andlinger Center for Energy  
and the Environment, Princeton University, Princeton, NJ 08544

\*Corresponding author email: E-mail: [zjren@princeton.edu](mailto:zjren@princeton.edu); phone: 609-258-7580

**Table S1 Constituents of synthetic bilge water**

| Components                    | Recipe                                                                                                                                                |
|-------------------------------|-------------------------------------------------------------------------------------------------------------------------------------------------------|
| Mixed oil<br>(1000 mg/L)      | 50% Diesel Fuel Marine (MIL-PRF-16884K)<br>25% 2190 TEP Steam Lube Oil (MIL-PRF-17331H(3))<br>25% 9250 Diesel Lube Oil (MIL-PRF-9000H)                |
| Mixed detergent (100<br>mg/L) | 50% Type 1 general purpose detergent (MIL-D-16791G)<br>25% commercial detergent Tide Ultra (liquid)<br>25% degreasing solvent (MIL-PRF-680, Type III) |
| Particulates (500 mg/L)       | Arizona test dust (ISO 12103-A4/A2), 50% coarse, 50% fine                                                                                             |
| Sea salt (15000 mg/L)         | ASTM D1141-52                                                                                                                                         |

**Table S2** Removal efficiency and removal rate during the first 5 min treatment.

| <b>Current Density<br/>(mA/cm<sup>2</sup>)</b> | <b>3.6</b> | <b>7.1</b> | <b>10.7</b> |
|------------------------------------------------|------------|------------|-------------|
| Removal<br>efficiency (%)                      | 58.1±2.1   | 90.1±1.6   | 96.5±0.1    |
| Removal rate<br>(mg/L/min)                     | 98.3±9.3   | 153±6.0    | 164.7±8.5   |

**Table S3** Zeta potential of synthetic bilge water solution.

| <b>Salt concentration (g/L)</b> | <b>Zeta (mV)</b> |
|---------------------------------|------------------|
| 0                               | -23.8            |
| 1                               | -22.8            |
| 5                               | -12.1            |
| 10                              | -10.4            |
| 15                              | -9.7             |
| 20                              | -8.1             |
| 25                              | -6.7             |

**Table S4** Element weight analysis for long-term used electrode

| <b>Element weight (%)</b> | <b>Mg</b> | <b>Al</b> | <b>Ca</b> | <b>C</b> | <b>O</b> |
|---------------------------|-----------|-----------|-----------|----------|----------|
| New electrode             | N.A.      | 67.41     | N.A.      | 28.12    | 4.46     |
|                           |           | ±0.35     |           | ±1.86    | ±0.38    |
| Anode                     | 0.10      | 33.07     | 0.10      | 19.82    | 46.9     |
|                           | ±0.08     | ±0.30     | ±0.05     | ±1.47    | ±0.58    |
| Cathode                   | 4.61      | 34.54     | 1.33      | 10.34    | 49.18    |
|                           | ±0.27     | ±0.46     | ±0.21     | ±2.03    | ±0.69    |
